# Supplementary material for: Global Dust Optical Depth Climatology Derived from CALIOP and MODIS Aerosol Retrievals on Decadal Time Scales: Regional and Interannual Variability
Source: Copernicus journal article supplement (doi:10.5194/acp-2021-1), 2021-02-17
Supplement: Supplementary file 1 [file acp-2021-1-supplement.pdf]

## Supplementary material

### Global Dust Optical Depth Climatology Derived from CALIOP and MODIS Aerosol Retrievals on Decadal Time Scales: Regional and Interannual Variability

Qianqian Song<sup>1,2</sup>, Zhibo Zhang<sup>1,2,\*</sup>, Hongbin Yu<sup>3</sup>, Paul Ginoux<sup>4</sup>, Jerry Shen<sup>3,#</sup>

1. Physics Department, UMBC, Baltimore, Maryland, USA
2. Joint Center of Earth Systems Technology, UMBC, Baltimore, Maryland, USA
3. Earth Sciences Division, NASA Goddard Space Flight Center, Greenbelt, Maryland, USA
4. NOAA Geophysical Fluid Dynamics Laboratory, Princeton, New Jersey, USA.

Correspondence to: Zhibo Zhang, [Zhibo.Zhang@umbc.edu](mailto:Zhibo.Zhang@umbc.edu)

# who worked as summer intern at NASA Goddard Space Flight Center during June–August 2020.

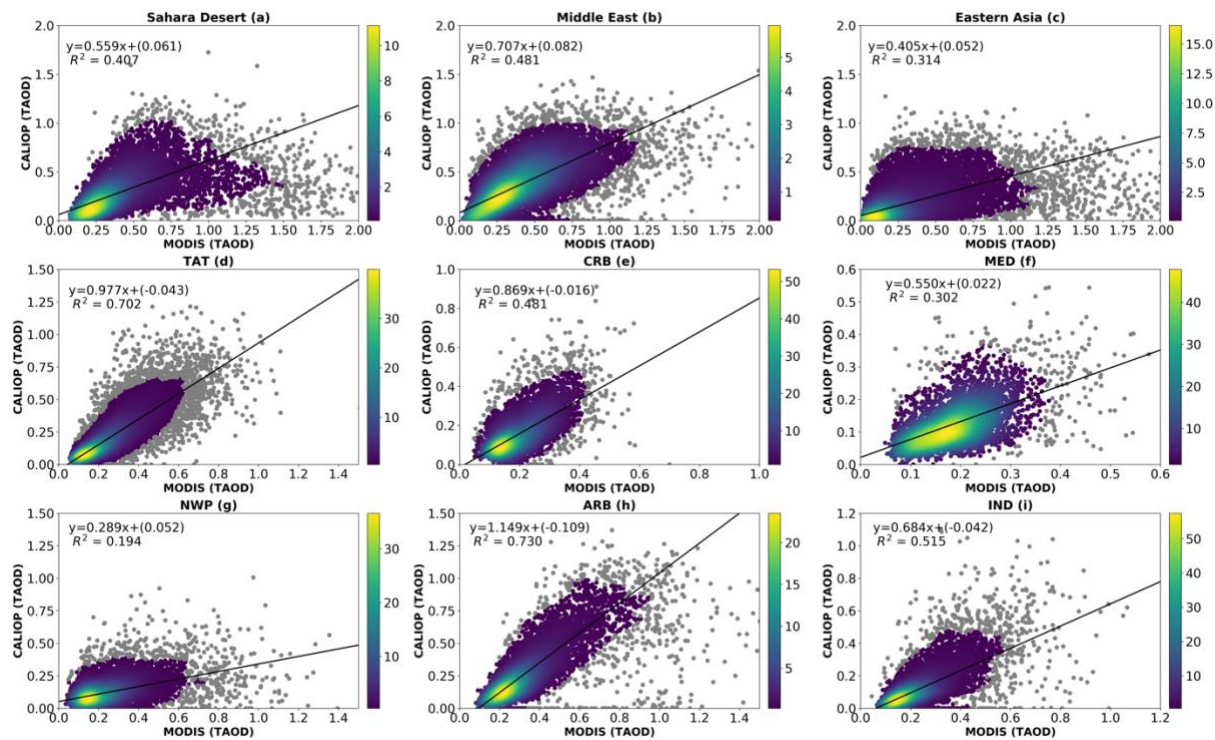

**Figure S1.** Same as Figure 5, except comparison in TAOD.

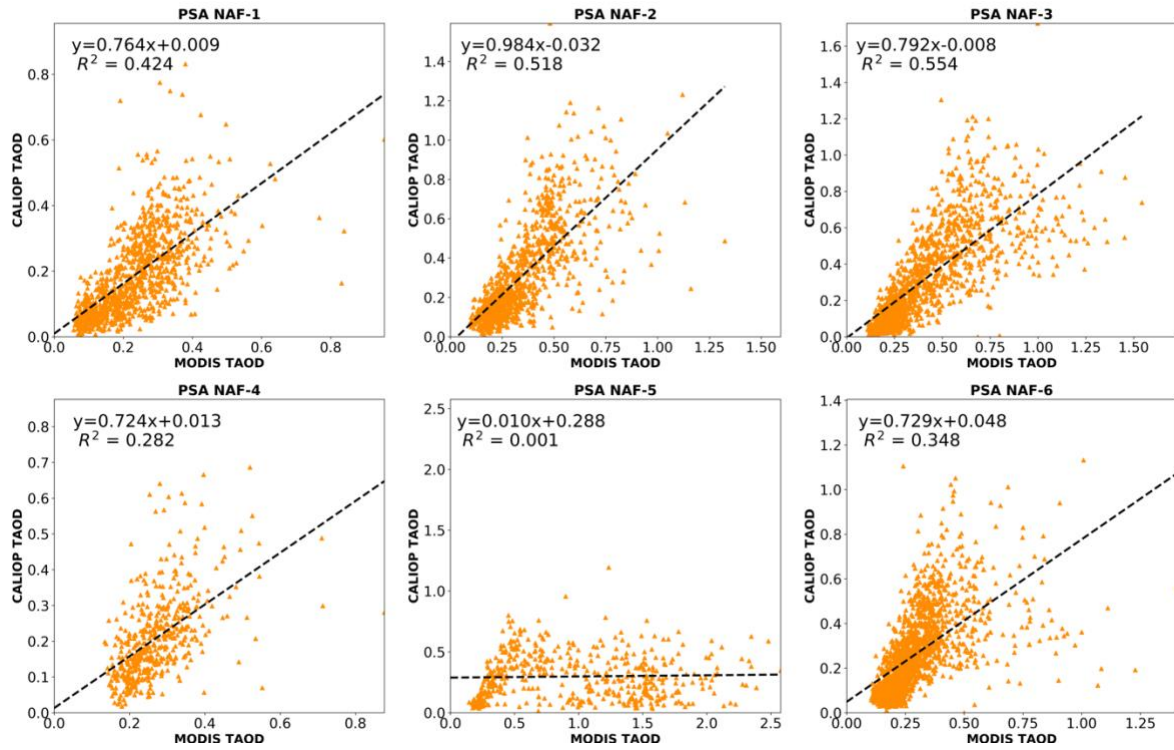

**Figure S2.** Same as Figure 9, except comparison in TAOD.

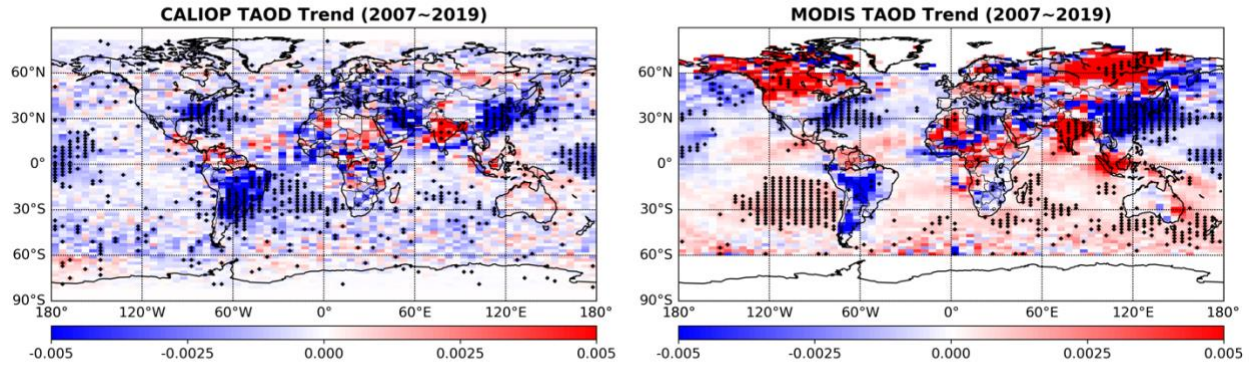

**Figure S3.** Same as Figure 11, except for TAOD

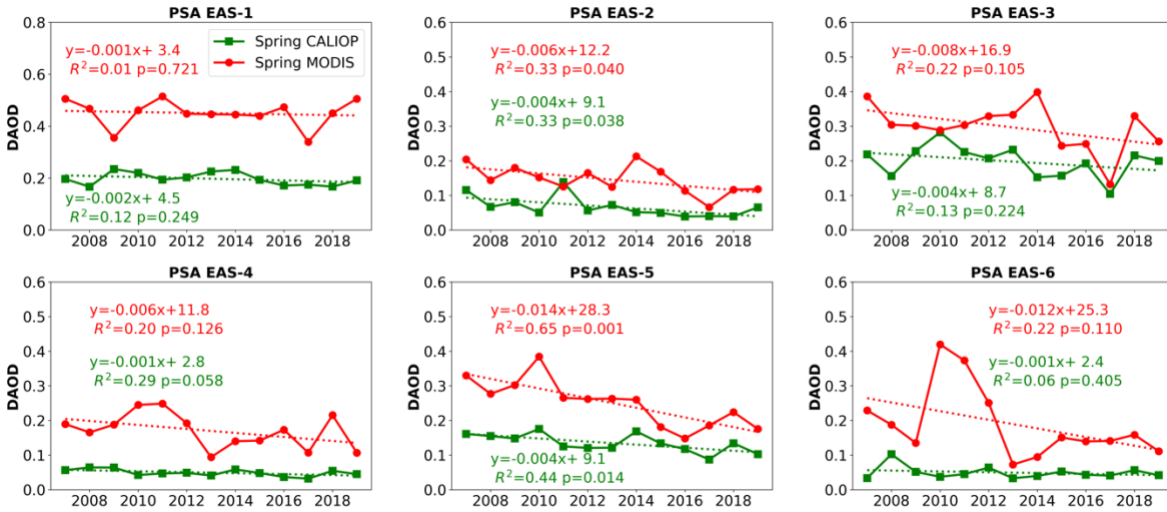

Figure S4. Same as Figure 13, except for inter-spring variability.
